# Supplementary material for: High-performance flexible dye-sensitized solar cells by using hierarchical anatase TiO2 nanowire arrays
Source: Royal Society of Chemistry journal article supplement (doi:10.1039/c5ra17294b), 2015-01-01
Supplement: c5ra17294b1.pdf [file c5ra17294b1.pdf]

## High-performance flexible dye-sensitized solar cells by using hierarchical anatase TiO<sub>2</sub> nanowire arrays

Zhisheng Chai<sup>a</sup>, Jiuwang Gu<sup>a</sup>, Javid Khan<sup>b</sup>, Yufei Yuan<sup>a</sup>, Lianhuan Du<sup>a</sup>, Xiang Yu<sup>c</sup>,  
Mingmei Wu<sup>b</sup> and Wenjie Mai<sup>a,\*</sup>

### Supporting Information

**Figure S1** Photograph of a piece of Ti mesh in bended status.

**Figure S2** SEM image of Ti mesh.

**Figure S3** Experiment setup for electrochemical anodization of Ti mesh.

**Figure S4** XRD patterns of Na<sub>2</sub>Ti<sub>2</sub>O<sub>5</sub>•H<sub>2</sub>O, H<sub>2</sub>Ti<sub>2</sub>O<sub>5</sub>•H<sub>2</sub>O and TiO<sub>2</sub> nanowires on Ti mesh.

**Figure S5** UV-Vis absorption spectra of desorption dye from different photoanode (NT, NW and HNW).

**Figure S6** (a) Schematic of the bending angle. (b) *J-V* curves of the TiO<sub>2</sub> HNW arrays mesh based DSSCs under different bending conditions.

**Table S1** Detailed comparison of the photoanode, counter electrode, PCE ( $\eta$ ), bending test, effective area and whether or not sealed between different mesh based flexible DSSCs.

**Figure S7** SEM image of the commercial ink counter electrode. Inset is the low-magnification image of Ink/Ti mesh electrode.

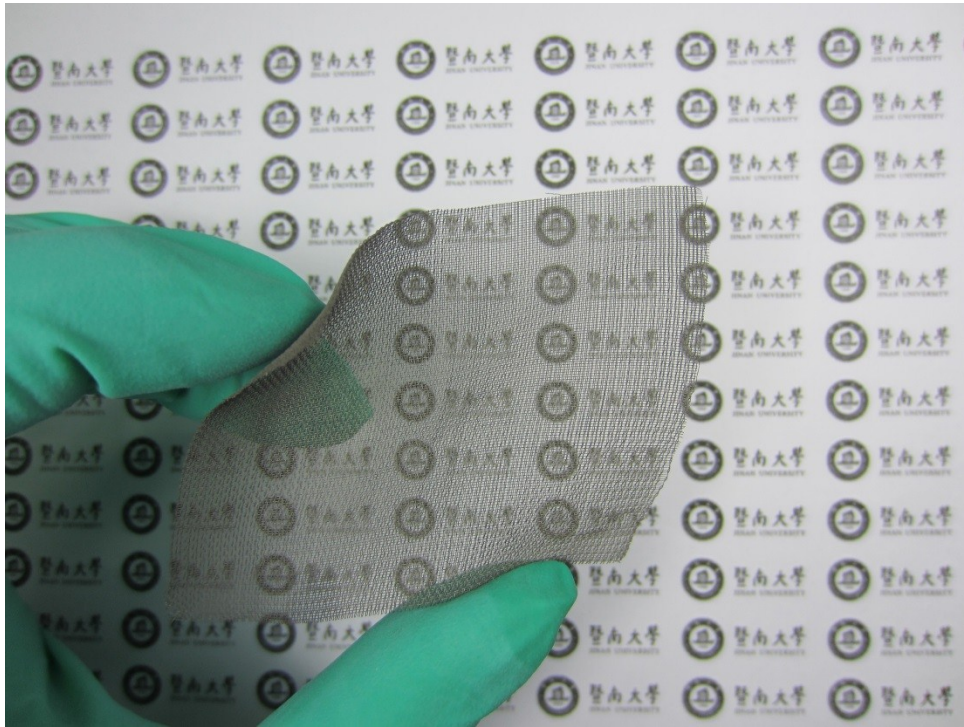

**Figure S1** Photograph of a piece of Ti mesh in bended status.

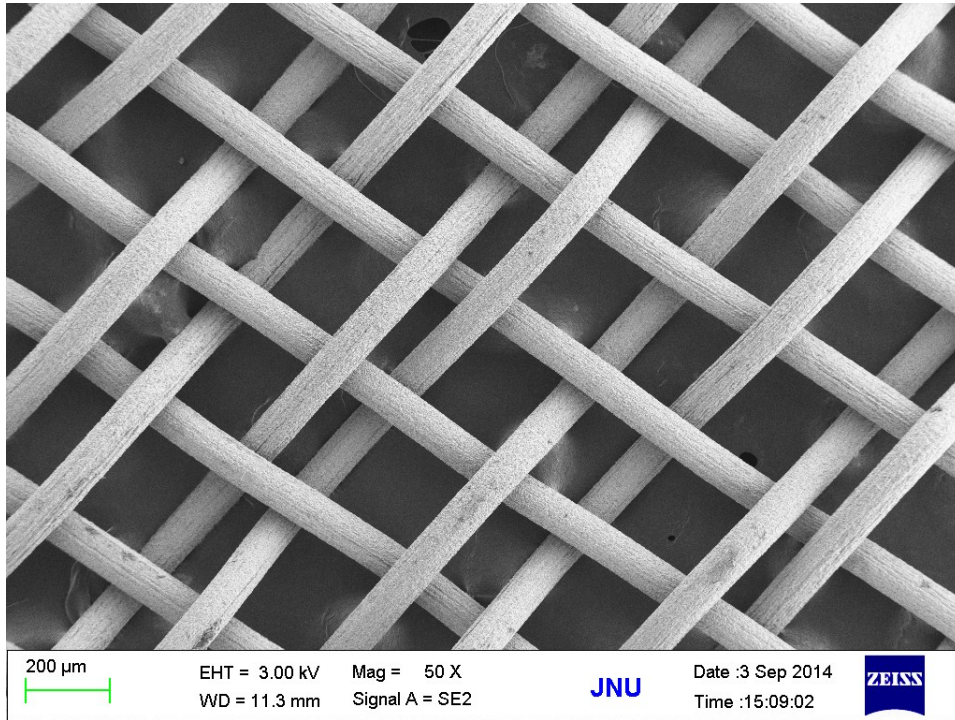

**Figure S2** SEM image of Ti mesh.

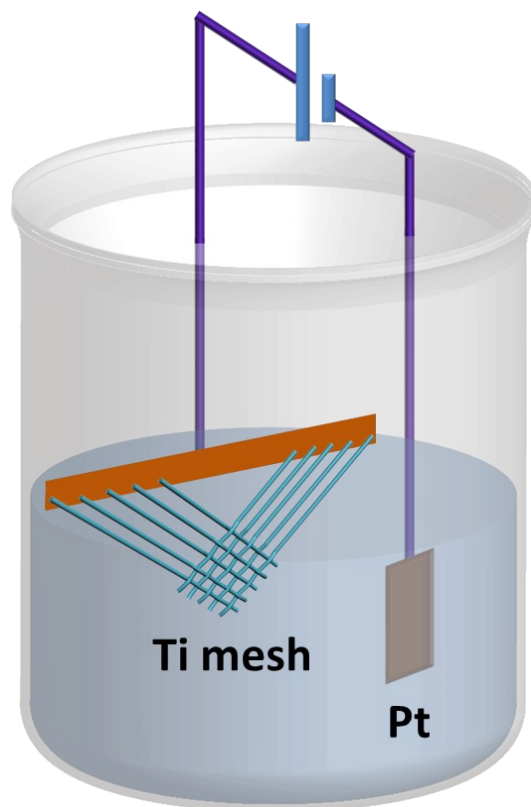

**Figure S3** Experiment setup for electrochemical anodization of Ti mesh.

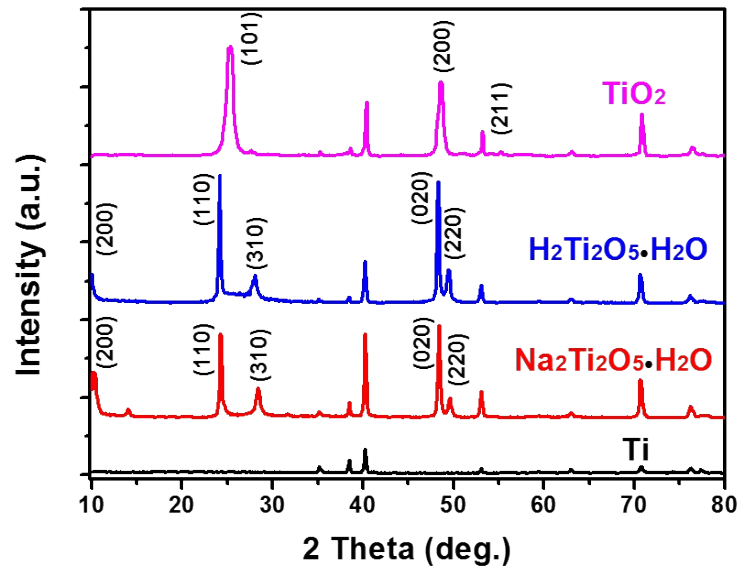

**Figure S4** XRD patterns of Na<sub>2</sub>Ti<sub>2</sub>O<sub>5</sub>·H<sub>2</sub>O, H<sub>2</sub>Ti<sub>2</sub>O<sub>5</sub>·H<sub>2</sub>O and TiO<sub>2</sub> nanowires on Ti mesh.

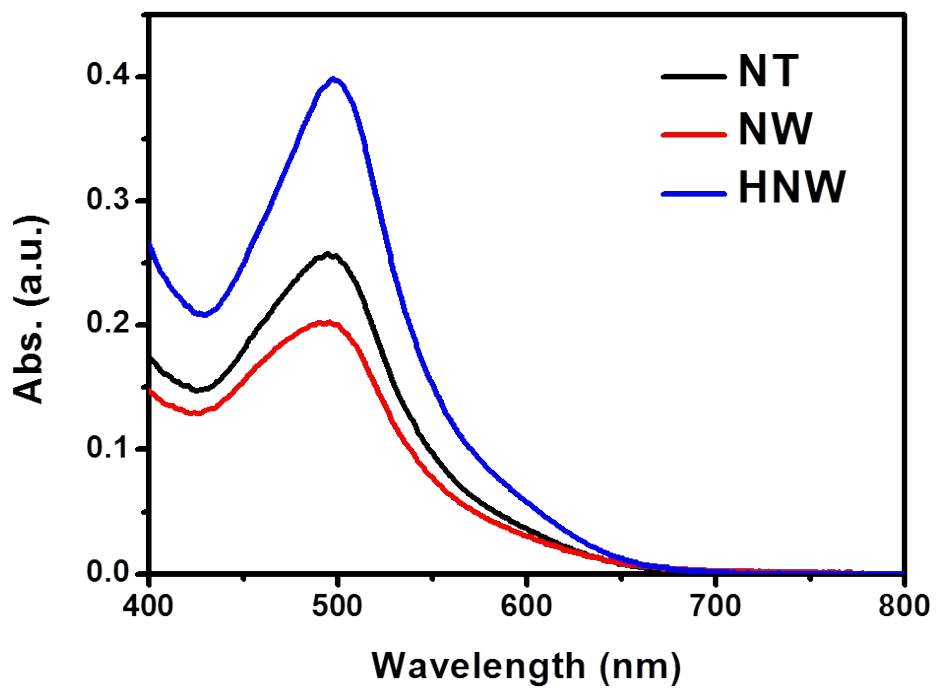

**Figure S5** UV-Vis absorption spectra of desorption dye from different photoanode (NT, NW and HNW).

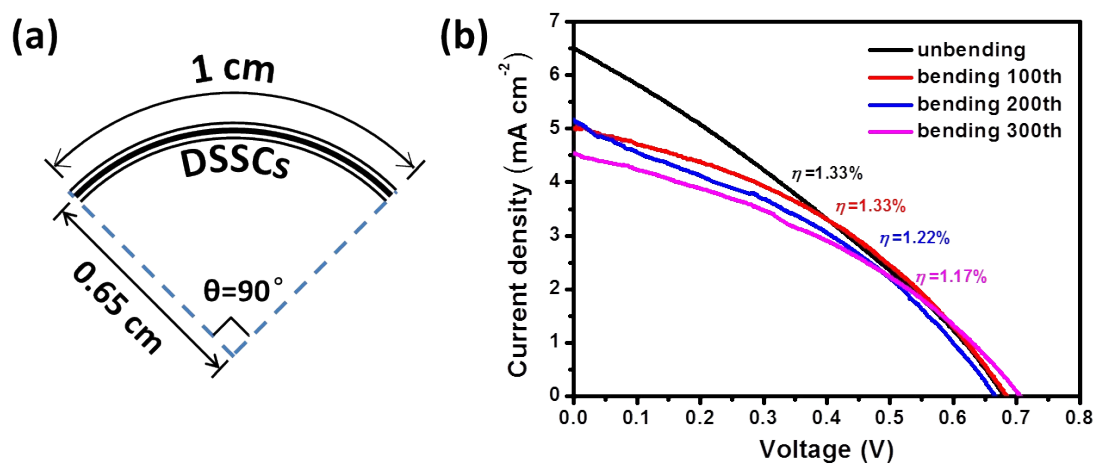

**Figure S6** (a) Schematic of the bending angle. (b)  $J-V$  curves of the  $\text{TiO}_2$  HNW arrays mesh based DSSCs under different bending conditions.

| photoanode                                   | counter electrode               | PCE (%)                                                  | bending test                                                   | effective area                      | sealed |
|----------------------------------------------|---------------------------------|----------------------------------------------------------|----------------------------------------------------------------|-------------------------------------|--------|
| NP- stainless steel mesh (120 meshes)        | Pt foil                         | 1.49                                                     | N/A                                                            | N/A                                 | N/A    |
| NT-Ti mesh (50 meshes)                       | Pt/ITO/PET                      | 1.23 (calculated from the geometric area of Ti mesh)     | Different angle (no mention of times )                         | Photo mask (0.283 cm <sup>2</sup> ) | N      |
| NT-Ti mesh (80 meshes)                       | CNT fiber textile               | 3.62 (CNT fiber sandwiched between two Ti wire textiles) | Maintain ~90% of PCE after 100th bending (no mention of angle) | Full area                           | Y      |
| NP- stainless steel mesh (635 meshes)        | Ink, Pt on stainless steel mesh | 0.83 for Ink, 0.93 for Pt                                | almost invariably of PCE (times: 500, radius: 1 cm)            | Full area                           | Y      |
| <b>Our work</b><br>(HNW-Ti mesh, 100 meshes) | Pt on Ti mesh                   | 1.75                                                     | Maintain ~90% of PCE (times: 300, angle: 90°)                  | Full area                           | Y      |

**Table S1** Detailed comparison of the photoanode, counter electrode, PCE ( $\eta$ ), bending test, effective area and whether or not sealed between different mesh based flexible DSSCs.



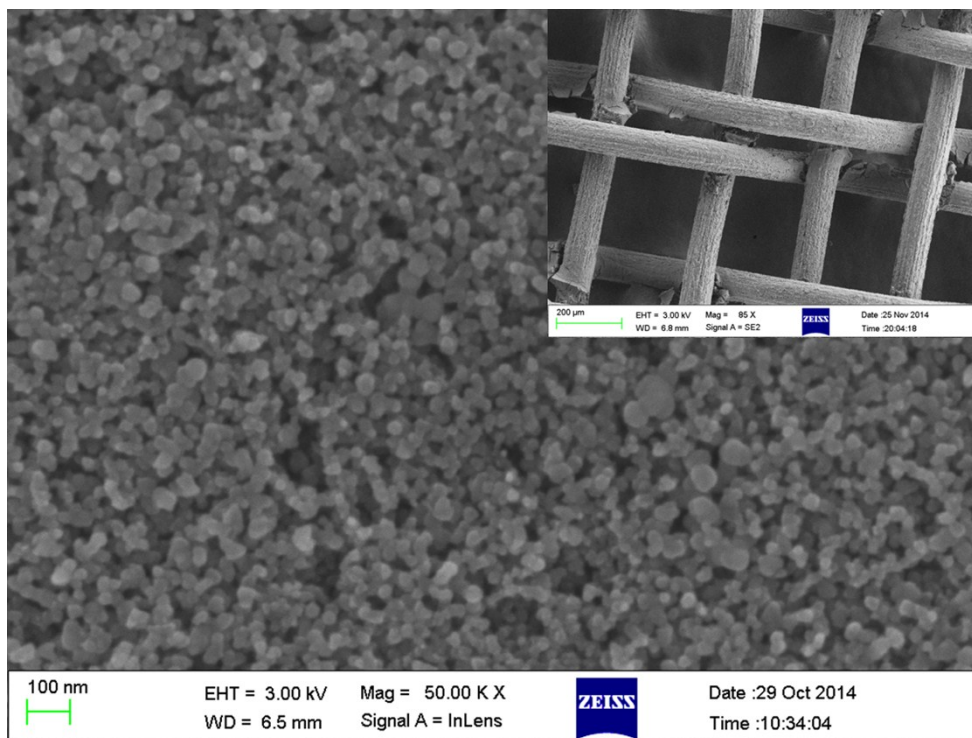

**Figure S7** SEM image of the commercial ink counter electrode. Inset is the low-magnification image of Ink/Ti mesh electrode.
